# Supplementary material for: Enhancer RNA Transcription Is Essential for a Novel CSF1 Enhancer in Triple-Negative Breast Cancer
Source: MDPI journal article supplement (doi:10.3390/cancers14071852), 2022-04-06
Supplement: s1 [file s1]

# Enhancer RNA Transcription is Essential for a Novel CSF1 Enhancer in Triple-Negative Breast Cancer

Michael W. Lewis <sup>1</sup>, Kamila Wisniewska <sup>1</sup>, Caitlin M. King <sup>1</sup>, Shen Li <sup>1</sup>, Alisha Coffey <sup>1</sup>, Michael R. Kelly <sup>1,2</sup>, Matthew J. Regner <sup>1,2</sup> and Hector L. Franco <sup>1,2,3,\*</sup>

<sup>1</sup> The Lineberger Comprehensive Cancer Center, University of North Carolina at Chapel Hill, Chapel Hill, NC 27599, USA; lewiswmw@email.unc.edu (M.W.L.); kamila@med.unc.edu (K.W.); caitlin\_king@med.unc.edu (C.M.K.); shenli@email.unc.edu (S.L.); coffey@med.unc.edu (A.C.); mkelly95@live.unc.edu (M.R.K.); regnerm@live.unc.edu (M.J.R.)

<sup>2</sup> Bioinformatics and Computational Biology Graduate Program, University of North Carolina at Chapel Hill, Chapel Hill, NC 27599, USA

<sup>3</sup> The Department of Genetics, School of Medicine, University of North Carolina at Chapel Hill, Chapel Hill, NC 27599, USA

\* Correspondence: hfranco@med.unc.edu

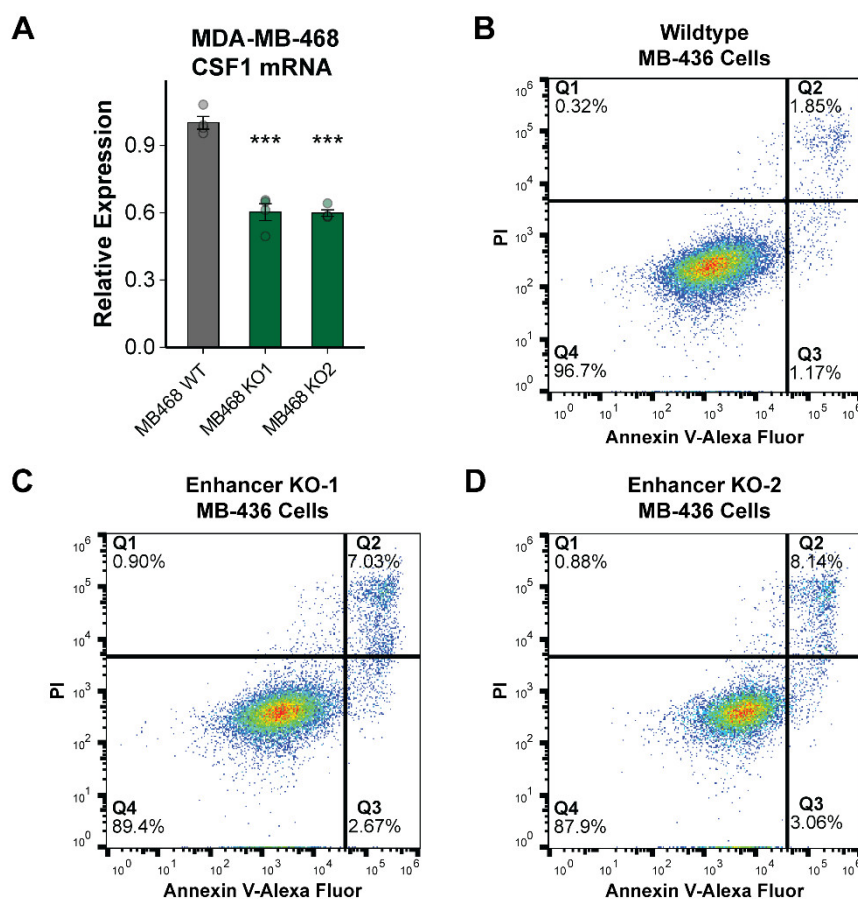

**Figure S1.** CSF1 enhancer knockout in MDA-MB-468 cells and apoptosis assay of MDA-MB-436 CSF1e-KO cells (related to Figure 2). (A) qRT-PCR displaying the relative fold change in CSF1 mRNA expression when comparing MB468 CSF1 enhancer KO lines to WT. Each bar represents the mean fold change (relative to a scrambled guide RNA) and each point shows the individual fold change per replicate. Error bars show standard error of the mean. Significance determined by a two-sided t-test comparing each promoter or enhancer sample to scrambled control (\*\* $p < 0.001$ ). (B–D) FACS sorting results of wildtype MDA MB-436 cells (B) compared to enhancer knockout cells (C and D) stained with propidium iodide and Annexin V-Alexa Fluor. The dot plots quantify the ratios of live (quadrant 4, Q4) vs apoptotic (quadrant 3, Q3) vs. dead (quadrant 2, Q2) cells.

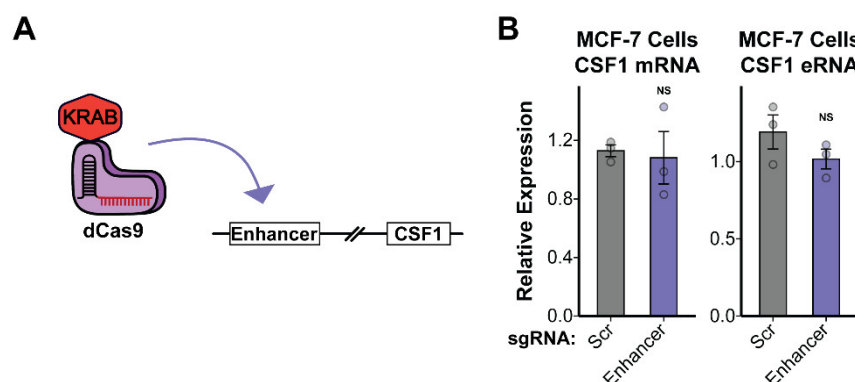

**Figure S2.** CSF1 mRNA expression after dCas9-KRAB perturbation of the enhancer in MCF-7 cells (related to Figure 3). **(A)** Diagram showing the targeting of dCas9-KRAB to the enhancer (purple) of CSF1. **(B)** qRT-PCR displaying the relative fold change in CSF1 mRNA and eRNA expression when targeting the CSF1 enhancer with dCas9-KRAB in MCF7 cells. Each bar represents the mean fold change (relative to a scrambled guide RNA) and each point shows the individual fold change per replicate. Error bars show standard error of the mean. Significance determined by a two-sided t-test comparing each promoter or enhancer sample to scrambled control (The designation of NS represents statistically not significant).

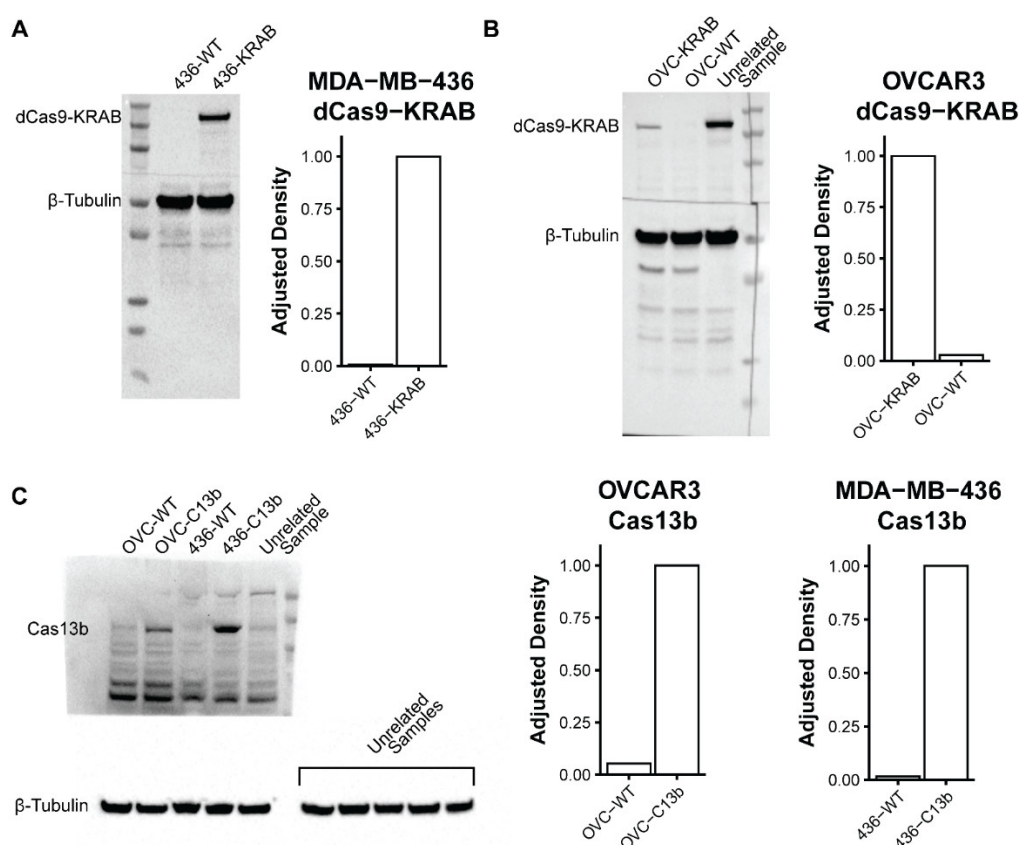

**Figure S3.** Original uncropped Western blots shown in main text (related to Figures 3–5). **(A)** Uncropped Western blot and densitometry analysis associated with Figure 3B. **(B)** Uncropped Western blot and densitometry analysis associated with Figure 5C. **(C)** Uncropped Western blot and densitometry analysis associated with Figure 4B (MDA-MB-436 Cas13b) and Figure 5D (OVCAR3 Cas13b).
